# Supplementary material
Source: publisher figshare collection journal article supplement (https://acs.figshare.com/ndownloader/files/24624193)
Supplement: Supplementary file 1 [file 24624193]

## Sheet: ACONF
Calculated relative energies for the ACONF data set for each functional in kcal mol-1. Reference values are included, results are numbered to match scheme from https://www.chemie.uni-bonn.de/pctc/mulliken-center/software/GMTKN/gmtkn55. All results were calculated using Def2-QZVP.
	BLYP	B3LYP	B2-PLYP	DOD-BLYP	DSD-BLYP	XYGJ-OS	MP2	SCS-MP2	SOS-MP2	XCH-BLYP-UW12	B-LYP-osUW12	fB-LYP-osUW12	BLYP-D3BJ	B3LYP-D3BJ	B2-PLYP-D3BJ	DOD-BLYP-D3BJ	DSD-BLYP-D3BJ	XCH-BLYP-UW12-D3BJ	B-LYP-osUW12-D3BJ	Ref.
1	1.08661	1.01848	0.838529	0.846522	0.699954	0.713351	0.563851	0.659342	0.707088	0.784989	0.520059	0.495638	0.674534	0.678919	0.67526	0.594323	0.637602	0.62172	0.578305	0.598
2	1.03131	0.983752	0.814879	0.835788	0.6846	0.711497	0.552945	0.658679	0.711546	0.838797	0.661355	0.65569	0.581135	0.611761	0.634641	0.558711	0.612418	0.658559	0.615827	0.614
3	2.15686	1.96972	1.50226	1.5573	1.1277	1.1906	0.773032	1.07141	1.22061	1.56373	1.22417	1.13947	0.958362	0.982162	1.02766	0.813785	0.950095	1.08914	0.993972	0.961
4	3.65545	3.60962	3.28716	3.32297	3.05352	3.05591	2.79671	2.98608	3.08076	3.44688	3.13601	3.16758	2.56702	2.71006	2.84996	2.68324	2.85362	3.00969	2.91518	2.813
5	1.12083	1.05389	0.846609	0.860785	0.686931	0.715597	0.523918	0.640105	0.698199	0.805296	0.505504	0.487459	0.639855	0.654801	0.651426	0.562695	0.613074	0.610113	0.558582	0.595
6	1.15284	1.08713	0.867762	0.885283	0.699297	0.733972	0.525683	0.65069	0.713194	0.83027	0.515187	0.49807	0.657469	0.676792	0.667727	0.576436	0.626748	0.630235	0.57602	0.604
7	2.43416	2.20349	1.62013	1.6586	1.16211	1.2372	0.70787	1.04141	1.20818	1.5385	0.841146	0.756316	1.10587	1.10483	1.08713	0.829943	0.970474	1.0055	0.872608	0.934
8	2.28031	2.13009	1.69881	1.72126	1.36757	1.41439	1.02983	1.26358	1.38045	1.63825	1.06308	1.01743	1.28311	1.30412	1.29694	1.09932	1.21375	1.23638	1.12426	1.178
9	2.19937	2.09249	1.73672	1.77897	1.45979	1.51828	1.18634	1.40615	1.51606	1.70565	1.22726	1.21374	1.29943	1.34675	1.37261	1.22808	1.32007	1.34153	1.26218	1.302
10	3.54096	3.17653	2.2891	2.36141	1.58576	1.69707	0.905112	1.43253	1.69624	2.23162	1.33306	1.17805	1.46259	1.46151	1.46198	1.06396	1.28928	1.4045	1.21796	1.25
11	3.87365	3.76129	3.28935	3.31734	2.94141	2.96863	2.56066	2.8143	2.94112	3.26054	2.51299	2.54082	2.63415	2.73281	2.78522	2.57309	2.73523	2.7564	2.62494	2.632
12	3.8133	3.73417	3.31846	3.35433	3.01471	3.03585	2.68373	2.91696	3.03357	3.3749	2.80273	2.83882	2.62364	2.74805	2.83592	2.64465	2.80992	2.89237	2.77958	2.74
13	4.8206	4.68736	4.08923	4.15134	3.63983	3.70061	3.15659	3.51337	3.69176	4.13709	3.34805	3.36214	3.22078	3.36125	3.4407	3.1779	3.37997	3.48856	3.33192	3.283
14	5.01004	4.79579	4.05312	4.13439	3.48581	3.56352	2.91565	3.3668	3.59237	4.12109	3.25282	3.25199	2.89641	3.04496	3.19787	2.88539	3.14161	3.26585	3.10924	3.083
15	6.82215	6.67932	5.95844	6.03145	5.42962	5.46862	4.87021	5.28979	5.49958	6.01406	4.94427	5.03714	4.6792	4.90362	5.08944	4.78029	5.0657	5.14507	4.97468	4.925

## Sheet: AL2X6
Calculated relative energies for the AL2X6 data set for each functional in kcal mol-1. Reference values are included, results are numbered to match scheme from https://www.chemie.uni-bonn.de/pctc/mulliken-center/software/GMTKN/gmtkn55. All results were calculated using Def2-QZVP.
	BLYP	B3LYP	B2-PLYP	DOD-BLYP	DSD-BLYP	XYGJ-OS	MP2	SCS-MP2	SOS-MP2	XCH-BLYP-UW12	B-LYP-osUW12	fB-LYP-osUW12	BLYP-D3BJ	B3LYP-D3BJ	B2-PLYP-D3BJ	DOD-BLYP-D3BJ	DSD-BLYP-D3BJ	XCH-BLYP-UW12-D3BJ	B-LYP-osUW12-D3BJ	Ref.
1	31.9382	33.48	35.2273	34.23	37.0638	36.9337	37.6242	35.6333	34.6379	35.3765	34.5608	34.6552	35.2256	36.2574	36.7309	39.1312	38.3901	36.8801	36.9	38.5
2	40.0434	44.6486	47.1995	47.5337	49.6678	50.7809	49.4763	48.7692	48.4156	51.2915	50.7586	52.7809	43.9018	47.8997	48.9474	52.6792	51.2539	53.0394	52.2803	51.6
3	18.4272	21.6412	26.2231	25.755	30.2026	30.0192	33.1617	30.2952	28.862	27.2442	28.97	30.2776	28.9293	30.4587	31.0055	35.6168	33.8297	32.0266	33.359	32.5
4	28.9117	31.0204	33.836	33.1102	36.3961	36.2684	37.8215	35.6566	34.5742	33.9917	34.2303	34.6272	35.0533	36.2061	36.6155	39.4674	38.376	36.7712	37.0896	38.4
5	17.8796	20.6789	24.759	23.9821	28.3988	28.3237	30.9282	27.9705	26.4917	25.1305	26.3114	27.0844	26.9433	28.2954	28.7523	32.9106	31.0677	29.1238	30.1158	31.2
6	5.70407	9.25865	14.7754	13.9608	19.6264	19.663	23.3986	19.5791	17.6694	15.3598	17.7156	18.8793	18.0782	19.6298	20.1456	25.7552	23.0655	20.7301	22.4713	23.1

## Sheet: Amino20x4
Calculated relative energies for the Amino20x4 data set for each functional in kcal mol-1. Reference values are included, results are numbered to match scheme from https://www.chemie.uni-bonn.de/pctc/mulliken-center/software/GMTKN/gmtkn55. All results were calculated using Def2-QZVP.
	BLYP	B3LYP	B2-PLYP	DOD-BLYP	DSD-BLYP	XYGJ-OS	MP2	SCS-MP2	SOS-MP2	XCH-BLYP-UW12	B-LYP-osUW12	fB-LYP-osUW12	BLYP-D3BJ	B3LYP-D3BJ	B2-PLYP-D3BJ	DOD-BLYP-D3BJ	DSD-BLYP-D3BJ	XCH-BLYP-UW12-D3BJ	B-LYP-osUW12-D3BJ	Ref.
1	1.55858	1.85624	1.54561	1.69996	1.37499	1.44251	1.11391	1.4069	1.55339	1.81676	1.16475	1.37288	0.376898	0.879122	1.06738	1.0435	1.15843	1.33852	1.17463	1.169
2	3.90353	4.04173	3.53217	3.58727	3.20418	3.2829	2.6061	2.92256	3.0808	3.95048	3.30677	3.43374	2.36269	2.76258	2.90697	2.69224	2.91723	3.32528	3.02143	3.049
3	4.18772	4.33794	3.87583	3.72061	3.72624	3.53215	3.3493	3.27387	3.23615	4.28354	3.59999	3.70671	2.93664	3.29538	3.3538	3.03622	3.37523	3.76151	3.40817	3.319
4	5.65372	5.87159	5.49687	5.26413	5.41359	5.30077	4.93661	4.76021	4.67201	6.07013	5.57887	5.73191	5.20695	5.50503	5.32653	4.97636	5.24315	5.8998	5.54095	5.044
5	0.951479	0.889778	1.28858	1.15352	1.58934	1.41594	1.95034	1.60171	1.4274	1.37828	2.51713	2.30535	2.7409	2.40424	2.07984	2.03153	1.93393	2.16955	2.29482	1.576
6	3.26295	3.03389	2.97523	2.77203	2.96191	2.74734	2.90706	2.68903	2.58001	3.17021	3.80577	3.52641	3.85191	3.55494	3.28877	2.88236	3.08146	3.48375	3.35764	2.529
7	2.86436	2.66357	2.84992	2.7869	2.93736	2.84104	3.08425	2.9648	2.90507	2.81598	3.55841	3.34287	3.54527	3.24875	3.17626	3.05873	3.09021	3.14232	3.20264	2.8
8	8.11134	8.08063	7.41885	7.23574	7.10149	6.93503	6.56571	6.56998	6.57212	7.92354	7.40872	7.37018	6.72653	6.93658	6.86484	6.44158	6.76634	7.36953	7.03059	6.459
9	0.410088	0.236335	0.353154	0.209281	0.415762	0.325141	0.461712	0.264973	0.166604	0.299796	0.616515	0.557458	0.62764	0.420995	0.453499	0.345592	0.433317	0.400141	0.452381	0.388
10	2.92184	3.25729	3.58842	3.2601	4.0127	3.84122	4.01404	3.41822	3.12031	4.02476	4.27238	4.50606	3.64863	3.8529	3.86872	3.87197	3.9496	4.30506	4.15605	4.109
11	3.58471	3.82135	4.26409	3.98638	4.69659	4.53905	4.85323	4.28449	4.00012	4.52554	4.95356	5.09908	4.60817	4.66037	4.66128	4.70945	4.73246	4.92273	4.87534	4.76
12	5.59909	5.74729	6.04566	5.5071	6.42202	6.38325	6.19787	5.42285	5.03534	6.52248	6.88986	6.97161	6.61163	6.56528	6.4155	6.31509	6.36901	6.89232	6.63761	6.532
13	-1.15333	-1.08469	-0.631649	-0.902963	-0.193725	-0.204651	0.114245	-0.460809	-0.748336	-0.370847	0.30998	0.397411	0.260547	0.0571899	-0.126148	0.199102	-0.0978915	0.134654	0.276523	0.157
14	0.469603	1.05063	1.3814	1.40721	1.74274	1.78907	1.82991	1.66369	1.58059	1.92628	2.17508	2.4628	1.07988	1.54242	1.59954	1.90137	1.76005	2.14442	2.07267	1.974
15	2.5496	2.89957	2.80554	3.06156	2.74382	2.97258	2.64938	2.98756	3.15666	3.04955	2.68555	2.88323	1.99469	2.43456	2.56322	2.80633	2.67455	2.80722	2.76348	2.897
16	1.97947	2.39595	2.60841	2.26408	3.01857	2.97561	2.97041	2.36577	2.06346	3.23777	3.23803	3.53093	2.532	2.81895	2.74981	2.98879	2.85034	3.37918	3.20379	3.113
17	0.775223	0.784409	0.513399	0.456339	0.415601	0.275395	0.325157	0.301564	0.289767	0.540828	0.245567	0.183434	0.567841	0.613745	0.437714	0.34191	0.37514	0.465144	0.37606	0.277
18	1.45099	1.41652	1.17581	1.14844	1.01478	1.03517	0.749098	0.837202	0.881253	1.23656	0.911973	0.916043	1.10147	1.11589	1.0092	1.01437	0.935389	1.06995	1.00865	0.979
19	1.20754	1.25029	1.13723	1.06806	1.14003	0.955305	1.13183	1.03918	0.992848	1.13691	0.887998	0.887345	1.13943	1.19461	1.11878	1.04095	1.1166	1.11846	1.03692	0.992
20	3.31927	3.02182	2.69493	2.53353	2.48022	2.44583	2.21896	2.17311	2.15019	2.54873	2.206	2.05015	2.69308	2.50005	2.42016	2.34203	2.3202	2.27396	2.24048	2.373
21	0.835536	0.897652	0.640186	0.701124	0.429505	0.52387	0.0723807	0.31113	0.430505	0.831491	0.632473	0.621165	0.103709	0.301584	0.36825	0.199016	0.323336	0.559555	0.372753	0.424
22	2.1378	2.56101	2.85384	2.9049	3.11627	2.99113	3.24763	3.16195	3.11911	3.08406	3.33667	3.4882	2.76977	3.10072	3.14619	3.23308	3.22406	3.37641	3.34896	3.272
23	3.61	3.97134	3.89077	3.68435	3.96736	3.98887	3.54935	3.34079	3.23651	4.47931	4.40771	4.51407	3.61279	3.9807	3.90452	3.74743	3.84991	4.49307	4.14891	4.045
24	3.76244	4.12363	4.03179	3.8961	4.0888	4.11262	3.71157	3.58373	3.5198	4.55907	4.4541	4.55404	3.45404	3.86816	3.90382	3.79139	3.90173	4.4311	4.09815	4.152
25	0.577342	0.815782	1.11843	1.01986	1.42442	1.24082	1.62316	1.31652	1.1632	1.36781	1.81839	1.92002	1.48655	1.56921	1.48542	1.55645	1.51747	1.7348	1.76976	1.335
26	0.110783	0.429466	1.01864	0.823019	1.56524	1.27092	1.97243	1.40199	1.11677	1.23998	1.98631	2.10266	1.79109	1.82886	1.71508	1.82872	1.76941	1.93642	2.01392	1.545
27	1.42525	1.89028	2.40417	2.17278	2.9649	2.66946	3.24525	2.642	2.34037	2.81545	3.40709	3.57456	3.03944	3.23053	3.06571	3.16766	3.12943	3.477	3.43857	2.939
28	7.43919	7.31596	6.34152	6.17873	5.72279	5.84379	4.75886	4.99794	5.11748	6.65758	5.36501	5.32566	5.14106	5.40225	5.38712	4.87344	5.24203	5.70318	5.21256	5.216
29	0.278684	-0.029956	0.535273	0.409237	0.822101	0.76809	1.27945	0.943841	0.776037	0.120528	0.875028	0.737459	1.52796	1.0045	1.04279	1.13882	1.03307	0.628044	0.883884	1.091
30	2.14443	2.12521	2.32706	2.26565	2.44255	2.54189	2.45102	2.3362	2.27879	2.40808	2.69175	2.73227	2.60409	2.4971	2.4973	2.61546	2.50526	2.57832	2.62072	2.627
31	2.17069	1.88248	2.30517	2.19529	2.50307	2.44012	2.82722	2.57134	2.44339	1.98346	2.58696	2.4706	2.84052	2.44077	2.58903	2.55486	2.59334	2.26732	2.41232	2.743
32	4.34888	4.24642	4.13918	4.09089	4.01562	4.08053	3.73004	3.79735	3.83101	4.26402	4.18087	4.20502	3.69681	3.70173	3.87039	3.76782	3.86875	3.99524	3.8885	4.086
33	2.2721	2.16431	2.56765	2.27607	2.92497	2.63258	3.2623	2.68959	2.40323	2.62005	3.25346	3.24793	2.88139	2.66528	2.80946	2.72145	2.89188	2.86186	2.90509	2.769
34	1.74336	1.95493	2.48016	2.2191	3.02711	2.70964	3.51454	2.85216	2.52097	2.57312	3.10554	3.20326	2.95967	2.96591	2.9761	3.03952	3.08448	3.06906	3.10009	2.992
35	7.53166	7.56315	7.50043	6.95176	7.64264	7.46076	7.22999	6.56859	6.23789	7.93942	7.77539	7.81036	7.32953	7.36252	7.34679	7.0876	7.3231	7.78578	7.43752	7.318
36	7.05226	7.12332	7.32513	6.79443	7.69183	7.33523	7.75735	6.9279	6.51318	7.58722	7.75987	7.76483	7.68676	7.6557	7.58995	7.32171	7.55235	7.85204	7.60891	7.37
37	-0.787036	-0.617115	-0.248022	-0.261304	0.0466171	-0.00297879	0.346032	0.141312	0.0389519	-0.282102	0.0222364	0.0959575	0.213771	0.218433	0.169604	0.319089	0.216117	0.135524	0.215856	0.187
38	-0.218368	-0.0717676	0.288643	0.415734	0.506034	0.477237	0.854987	0.843884	0.838333	0.172735	0.461057	0.541556	0.516598	0.543975	0.600609	0.799913	0.690423	0.484701	0.659564	0.595
39	0.525441	0.434703	0.691695	0.659551	0.826038	0.879121	0.997895	0.875509	0.814316	0.599649	0.978427	0.936773	1.20292	0.994535	0.96287	1.10714	0.959403	0.870824	1.0067	0.963
40	0.228698	0.183784	0.564882	0.575411	0.770262	0.847829	1.02926	0.91349	0.855605	0.341762	0.626645	0.665889	0.946368	0.775615	0.850585	1.06138	0.903915	0.627465	0.795221	0.995
41	0.275261	0.25992	0.326959	0.340602	0.344543	0.329169	0.387837	0.388729	0.389175	0.270755	0.311504	0.310498	0.287935	0.267001	0.329402	0.362184	0.358022	0.273198	0.312057	0.338
42	2.31547	2.25317	1.93471	1.99466	1.68109	1.76477	1.42146	1.64707	1.75988	1.90562	1.38572	1.40725	1.34521	1.44622	1.53682	1.41355	1.51985	1.50773	1.41265	1.524
43	1.51824	1.5738	1.69415	1.77464	1.74076	1.71468	1.84237	1.89706	1.9244	1.6423	1.6319	1.70792	1.33052	1.41476	1.61592	1.69534	1.71845	1.56407	1.62555	1.686
44	2.56659	2.53816	2.29281	2.37615	2.06634	2.19808	1.82501	2.07936	2.20654	2.26505	1.7921	1.83499	1.53011	1.68146	1.87525	1.81551	1.89196	1.8475	1.77506	1.952
45	-0.091511	0.00388115	0.0462362	0.0901342	0.0874372	0.113753	0.109842	0.131614	0.1425	0.127338	0.129113	0.199599	-0.170927	-0.0605527	0.0179386	0.0638917	0.0672947	0.0990404	0.0796353	0.058
46	0.179611	0.19205	0.19435	0.19078	0.200716	0.198904	0.197158	0.18994	0.186331	0.199394	0.173108	0.186885	0.187316	0.198336	0.1971	0.200084	0.198889	0.202145	0.196685	0.199
47	1.12164	1.03961	0.778216	0.803383	0.579573	0.626866	0.376946	0.530187	0.606808	0.768944	0.419907	0.424296	0.472547	0.496019	0.506014	0.401662	0.473125	0.496742	0.432858	0.456
48	1.65598	1.58424	1.11713	1.15863	0.784031	0.882613	0.377799	0.640159	0.771339	1.24273	0.629155	0.677295	0.395621	0.527165	0.585899	0.415532	0.551981	0.711499	0.537988	0.54
49	-0.239373	0.404484	1.07598	1.1987	1.62347	1.56	2.10744	1.90425	1.80266	1.3024	1.79462	2.00453	1.27419	1.65591	1.68817	1.9912	1.87325	1.91458	1.93389	1.814
50	0.0805873	0.60224	1.44523	1.14286	2.27918	1.94115	2.90483	2.0365	1.60234	1.67216	2.48272	2.55745	2.68102	2.75173	2.51434	2.74962	2.6499	2.74127	2.71756	2.459
51	0.634454	1.03541	1.66142	1.51084	2.19937	2.13433	2.48298	2.00903	1.77206	1.98206	2.75229	2.82276	2.02972	2.18494	2.21122	2.34888	2.3074	2.53185	2.44714	2.466
52	0.580468	1.10377	1.89664	1.60572	2.67587	2.38166	3.20298	2.39915	1.99723	2.05707	2.709	2.81407	2.98867	3.09357	2.86467	3.07502	2.95138	3.0251	2.98771	2.896
53	-0.579658	-0.205639	0.37748	0.441691	0.880679	0.634699	1.53232	1.24124	1.09571	0.354363	0.871181	1.00833	0.925057	1.05069	1.01308	1.24183	1.1482	0.989958	1.14761	0.872
54	1.79384	1.99633	1.92948	2.08072	1.91236	1.89227	1.99826	2.15287	2.23018	2.06248	1.89393	2.008	1.32139	1.61128	1.74633	1.85119	1.84107	1.87933	1.90636	1.719
55	1.38927	1.62923	1.69138	1.87414	1.71877	1.89901	1.72152	1.91594	2.01314	1.88136	1.86182	2.01081	1.69251	1.86719	1.79279	2.01639	1.83045	1.98277	2.02252	1.84
56	2.76296	2.59426	2.28608	2.25059	2.04587	2.13985	1.77257	1.88838	1.94629	2.23632	1.85899	1.80281	2.12844	2.06257	2.01087	1.9287	1.93006	1.96111	1.92159	1.889
57	0.79434	0.991145	1.18072	1.18864	1.35712	1.37241	1.44886	1.35642	1.31021	1.30349	1.38418	1.53713	1.22021	1.33341	1.33196	1.50949	1.4122	1.45473	1.51199	1.396
58	3.47207	3.37381	3.23538	3.01069	3.13659	3.263	2.67326	2.55381	2.49408	3.49572	3.41896	3.38096	2.94011	2.91357	2.98415	2.84752	2.94715	3.24448	3.01948	3.211
59	4.31418	4.25796	4.17835	3.95071	4.13324	4.26395	3.73813	3.5696	3.48533	4.43409	4.33012	4.36271	3.91234	3.90506	3.98062	3.85567	3.96106	4.23635	4.03336	4.187
60	5.92214	5.86009	5.90006	5.56947	5.97069	6.04056	5.68556	5.31093	5.12362	6.05056	5.98656	5.99192	5.80294	5.74386	5.81417	5.66942	5.77862	5.96467	5.75697	6.014
61	2.60705	2.64675	2.84425	2.74756	3.02081	3.02335	3.11977	2.90649	2.79985	2.93214	3.11023	3.21941	2.90172	2.88794	2.9568	2.97975	3.00287	3.04469	3.05096	3.026
62	2.60611	2.67644	2.90854	2.86746	3.09563	3.08662	3.24965	3.08562	3.0036	2.99382	3.19168	3.32229	2.9267	2.93794	3.02944	3.10765	3.0999	3.11471	3.15761	3.103
63	2.84158	2.80964	3.12437	2.86165	3.42352	3.33953	3.53507	3.09025	2.86785	3.32195	3.77565	3.89472	3.64959	3.46934	3.43188	3.46667	3.44866	3.62945	3.67609	3.513
64	2.65031	2.79624	3.47392	3.58751	3.87096	4.0476	4.31759	4.19662	4.13613	3.45889	4.09873	4.31741	3.35328	3.37335	3.74771	4.1206	3.96661	3.73268	3.95512	4.183
65	1.26373	1.22722	1.21929	0.876516	1.33933	1.19932	1.13652	0.735129	0.534431	1.43729	1.40731	1.44547	1.83207	1.66988	1.39113	1.37255	1.31637	1.60912	1.52736	1.339
66	3.46609	3.53792	3.38752	3.2402	3.33724	3.20507	3.03475	2.94353	2.89793	3.76734	3.57093	3.68541	2.97236	3.11789	3.17076	2.977	3.16424	3.55057	3.35246	3.08
67	4.0548	3.94816	3.65913	3.26025	3.59051	3.3693	3.08851	2.76373	2.60134	4.01076	3.73386	3.72607	3.62048	3.56658	3.44056	3.14494	3.34747	3.79219	3.50043	3.506
68	4.92602	4.74412	4.42764	4.04202	4.37418	4.04508	4.06792	3.71862	3.54397	4.67422	4.38372	4.3785	4.50129	4.37513	4.21604	3.93412	4.1263	4.46261	4.28228	4.224
69	0.0814407	0.499251	0.86727	1.06267	1.16007	1.08298	1.5082	1.532	1.54391	0.97071	1.30341	1.47519	1.00192	1.27088	1.26482	1.47893	1.38528	1.36826	1.48789	1.293
70	4.73949	4.67369	3.71175	3.97798	2.93369	3.33818	1.96949	2.81332	3.23523	4.06229	3.00221	3.09467	1.99009	2.39432	2.59353	2.36366	2.53973	2.94407	2.69015	2.828
71	5.7462	5.66644	4.5258	4.673	3.65291	4.02566	2.48838	3.2584	3.64341	4.99546	3.86171	3.8772	3.1712	3.53478	3.46872	3.25364	3.30433	3.93838	3.70878	3.244
72	4.76952	4.87607	4.40548	4.5161	4.05111	4.22824	3.44957	3.84888	4.04853	4.73366	4.19767	4.25365	3.48479	3.8094	3.88425	3.71713	3.84649	4.21243	3.94873	4.057
73	0.223104	0.209406	0.149767	0.129372	0.113884	0.125283	0.0485514	0.0526788	0.0547425	0.103233	-0.0805095	-0.0595582	0.129393	0.130698	0.108995	0.0804403	0.0913083	0.0624612	0.0346461	0.093
74	-0.397961	-0.0426694	0.463339	0.496255	0.912538	0.696916	1.43762	1.16174	1.02381	0.443156	0.848071	0.988941	0.99478	1.1221	1.05484	1.23612	1.1575	1.03466	1.1599	0.903
75	1.32382	1.54377	1.57521	1.75411	1.57907	1.77152	1.5543	1.76161	1.86526	1.74843	1.68967	1.84375	1.54615	1.71512	1.64374	1.85143	1.67438	1.81697	1.85566	1.707
76	1.97007	2.15582	2.03433	2.16957	1.98188	1.97859	2.0094	2.17279	2.25448	2.10581	1.76564	1.89438	1.41334	1.70176	1.81762	1.89636	1.89443	1.88909	1.89455	1.772
77	0.798922	0.809353	0.887594	1.05736	0.865738	0.893296	1.00052	1.18813	1.28194	0.776264	0.800071	0.852191	0.644318	0.683217	0.830632	0.942642	0.90079	0.719301	0.858721	0.849
78	1.42366	1.16437	1.04067	1.0184	0.874424	0.985659	0.731457	0.815966	0.85822	0.849283	0.687956	0.599222	1.20025	0.973818	0.938466	0.948528	0.867678	0.747083	0.797101	0.86
79	1.4061	1.43034	1.4262	1.51832	1.40518	1.40897	1.48856	1.59063	1.64166	1.34466	1.16448	1.25368	1.18629	1.25266	1.34376	1.39699	1.3878	1.26221	1.33627	1.355
80	2.06067	2.04384	1.78874	1.85856	1.56227	1.73596	1.27208	1.51683	1.6392	1.79288	1.32391	1.36788	0.957725	1.12929	1.33731	1.28546	1.36154	1.34144	1.24453	1.484

## Sheet: BHPERI
Calculated relative energies for the BHPERI data set for each functional in kcal mol-1. Reference values are included, results are numbered to match scheme from https://www.chemie.uni-bonn.de/pctc/mulliken-center/software/GMTKN/gmtkn55. All results were calculated using Def2-QZVP.
	BLYP	B3LYP	B2-PLYP	DOD-BLYP	DSD-BLYP	XYGJ-OS	MP2	SCS-MP2	SOS-MP2	XCH-BLYP-UW12	B-LYP-osUW12	fB-LYP-osUW12	BLYP-D3BJ	B3LYP-D3BJ	B2-PLYP-D3BJ	DOD-BLYP-D3BJ	DSD-BLYP-D3BJ	XCH-BLYP-UW12-D3BJ	B-LYP-osUW12-D3BJ	Ref.
1	28.8654	33.0322	33.7233	35.7141	34.8233	36.4713	34.1491	36.3862	37.5048	37.8481	37.3635	40.7508	28.3546	32.6124	33.5236	35.2319	34.8082	37.6484	36.9626	35.3
2	29.1915	31.2668	29.749	33.419	27.7618	33.0899	24.4319	30.5633	33.6291	32.6976	31.4401	33.269	26.715	29.2403	28.7945	31.3777	28.7994	31.7431	31.4531	30.8
3	26.2238	28.3006	26.8014	29.9344	25.0159	29.4501	21.535	27.1735	29.9927	29.8452	28.7241	30.3612	25.9809	28.0972	26.7044	29.5019	26.4816	29.7482	29.6199	28.1
4	35.8449	38.9526	38.2637	42.4683	36.7495	41.9261	33.5965	40.1846	43.4787	41.4759	40.3747	42.9057	34.314	37.7163	37.7173	40.9886	38.1116	40.9295	40.9242	39.7
5	26.2873	27.1361	26.7359	29.4764	25.3571	29.2582	23.52	28.0784	30.3577	27.568	27.4661	28.3385	26.6475	27.433	26.8803	29.8048	26.8086	27.7124	28.5191	28.3
6	31.9243	36.0829	33.9648	38.5669	31.4936	38.6252	26.1549	34.0095	37.9368	38.9577	36.2895	39.411	28.8684	33.601	32.8297	36.1358	32.8414	37.8226	37.1091	35.8
7	24.9354	26.4801	22.8276	27.66	18.631	25.6532	13.4651	22.0892	26.4013	26.0005	23.0861	24.8398	16.7667	19.7882	19.6913	21.3627	19.2722	22.8641	22.4176	22.3
8	23.5781	24.3773	19.5484	23.7401	14.4004	21.1943	7.94471	16.6254	20.9658	22.2422	18.1713	19.0606	14.903	17.2671	16.2058	17.0534	15.0217	18.8995	18.0563	18
9	23.1915	23.9322	17.0885	21.4527	10.4025	17.8927	1.61444	11.7591	16.8315	20.638	14.0179	15.2544	11.556	14.3286	12.4304	13.7345	10.7979	15.9799	15.1274	14.5
10	14.8929	21.8244	21.367	25.3294	21.6518	27.528	18.3993	23.8729	26.6098	29.2704	27.2861	32.9664	15.2733	22.1287	21.4948	25.8862	22.7791	29.3982	28.7527	26.4
11	25.4979	28.9923	27.2864	31.4875	25.7702	29.6642	24.4471	30.5733	33.6365	30.3153	27.7444	30.1388	21.2802	25.5665	25.7356	27.7599	26.4241	28.7646	28.5258	27.6
12	19.9267	22.5588	20.0141	23.9833	17.4195	22.3081	14.1684	20.843	24.1803	23.1361	20.5313	22.4296	15.0591	18.5954	18.2046	19.8275	18.2044	21.3266	20.9824	20
13	16.5572	18.3876	14.9407	17.823	11.3175	16.6502	5.23074	11.4688	14.5878	18.5373	15.8972	17.3057	11.2517	14.0574	12.942	13.4946	12.002	16.5386	15.8918	13.8
14	12.3061	15.5625	12.2967	15.3717	10.0848	13.0663	6.60199	12.0008	14.7001	16.9612	13.8213	15.9643	7.66893	11.7802	10.5521	11.5347	10.4639	15.2166	14.3025	11.8
15	9.10826	10.4104	7.0926	9.90024	3.65167	8.97456	-1.29144	4.4833	7.37067	10.0474	7.72157	8.77349	4.05364	6.27662	5.16841	5.88326	4.29637	8.12317	7.75391	6.5
16	8.84441	9.75815	5.8334	8.39933	2.02158	7.12647	-3.2446	2.56606	5.47138	9.08912	6.61407	7.46054	3.45009	5.33795	3.7586	4.23278	2.60839	7.01432	6.52948	4.7
17	15.6703	16.5751	13.6974	16.9745	10.5132	15.8249	7.2048	13.1315	16.0949	15.5196	13.2728	14.1079	10.273	12.1705	11.6732	12.5379	11.1511	13.4954	13.3071	13.1
18	10.125	10.3767	6.83543	9.96244	2.78606	8.97088	-2.18239	4.20943	7.40534	8.75999	6.4427	6.96808	3.96434	5.34736	4.52136	5.06038	3.49004	6.44592	6.16852	5.9
19	5.11683	4.95607	1.76697	4.32228	-1.78973	3.30931	-5.79137	-0.511355	2.12865	3.25352	1.24025	1.53576	-0.901016	0.0193423	-0.549982	-0.181612	-1.42846	0.936568	0.774064	0.5
20	23.6211	24.5307	19.5867	23.8789	14.3374	21.2418	7.65456	16.5739	21.0336	22.5032	18.3091	19.2687	14.9445	17.4204	16.247	17.1634	15.0232	19.1635	18.2515	18.1
21	22.2864	23.2736	18.0055	22.9375	12.4411	19.9835	5.572	15.4031	20.3186	21.374	17.4175	18.7819	12.2493	15.0201	14.0424	14.9348	12.7307	17.4109	16.4013	16.6
22	29.4239	29.7719	25.4228	28.9511	20.6748	26.0302	14.9089	22.5094	26.3096	27.1618	23.0167	23.339	22.1833	23.843	22.6451	23.3425	21.398	24.384	23.7208	22.9
23	35.5522	36.0657	31.2129	34.2175	26.491	30.9253	20.6697	27.4612	30.857	33.3703	28.548	28.7492	27.6922	29.631	28.2046	28.1768	26.8693	30.362	29.2217	27.8
24	28.3815	29.1786	23.6421	27.5585	18.0914	24.4179	10.7488	19.5356	23.929	26.9656	22.4101	23.3505	18.4914	21.0595	19.7667	19.8224	18.2038	23.0901	21.7109	21.3
25	28.2375	29.0557	23.5652	27.6745	17.9847	24.7349	10.6797	19.7018	24.2129	26.8815	22.426	23.3687	18.5084	21.0712	19.7578	20.2972	18.2932	23.0741	21.9152	21.6
26	38.751	39.5936	34.3621	37.6528	29.2687	34.3791	22.4255	30.062	33.8803	37.36	32.5924	33.2736	29.4231	31.9439	30.7255	30.4803	29.2698	33.7234	32.3013	31.3

## Sheet: BUT14DIOL
Calculated relative energies for the BUT14DIOL data set for each functional in kcal mol-1. Reference values are included, results are numbered to match scheme from https://www.chemie.uni-bonn.de/pctc/mulliken-center/software/GMTKN/gmtkn55. All results were calculated using Def2-QZVP.
	BLYP	B3LYP	B2-PLYP	DOD-BLYP	DSD-BLYP	XYGJ-OS	MP2	SCS-MP2	SOS-MP2	XCH-BLYP-UW12	B-LYP-osUW12	fB-LYP-osUW12	BLYP-D3BJ	B3LYP-D3BJ	B2-PLYP-D3BJ	DOD-BLYP-D3BJ	DSD-BLYP-D3BJ	XCH-BLYP-UW12-D3BJ	B-LYP-osUW12-D3BJ	Ref.
1	0.22572	0.237144	0.231692	0.258297	0.222106	0.210518	0.22187	0.25329	0.269	0.266896	0.25187	0.280049	0.0239345	0.0738635	0.15947	0.137637	0.185578	0.194674	0.170309	0.15
2	1.33179	1.03409	0.716502	0.573524	0.509124	0.403041	0.309425	0.277737	0.261893	0.622823	0.446949	0.248472	1.09538	0.843777	0.633221	0.382578	0.470892	0.539542	0.452991	0.3
3	2.04778	1.96553	1.71665	1.6102	1.59769	1.47904	1.40109	1.36321	1.34427	1.82798	1.65112	1.57263	1.70723	1.69294	1.59982	1.35661	1.51419	1.71114	1.53543	1.31
4	2.55006	2.2932	1.92356	1.8257	1.66171	1.56091	1.39314	1.45319	1.48322	1.85082	1.60005	1.39836	2.18755	2.00598	1.80604	1.47302	1.63034	1.7333	1.58514	1.44
5	2.71422	2.5027	2.20648	2.16599	1.97577	1.89701	1.74558	1.84855	1.90004	2.21317	2.093	1.94384	2.16939	2.06922	2.02636	1.70984	1.91025	2.03305	1.88462	1.72
6	2.46931	2.44791	2.35947	2.26307	2.34612	2.1959	2.27811	2.17039	2.11653	2.42137	2.25905	2.25291	2.3116	2.32581	2.31585	2.11459	2.28757	2.37775	2.23028	2.07
7	1.61456	1.50469	1.60776	1.26954	1.77779	1.64356	1.7224	1.26983	1.04354	1.68864	1.93478	1.83075	2.66868	2.36568	2.00807	1.91777	1.86712	2.08895	2.00383	1.77
8	1.80175	1.86869	2.09298	1.82181	2.36055	2.21633	2.38249	1.93703	1.71429	2.31871	2.5486	2.59916	2.58274	2.51035	2.39963	2.32061	2.37356	2.62536	2.46657	2.25
9	1.71479	1.69951	1.86624	1.56517	2.08733	1.95016	2.07286	1.62624	1.40293	2.03313	2.29715	2.26965	2.6311	2.44985	2.21933	2.13671	2.13838	2.38622	2.26675	2.03
10	2.86227	2.63905	2.39465	2.08546	2.31048	2.17083	2.01285	1.74954	1.61789	2.50299	2.39152	2.24497	3.0009	2.75074	2.44353	2.16154	2.25536	2.55187	2.3458	2.1
11	2.87924	2.59219	2.29092	1.94957	2.16499	2.03142	1.82489	1.55521	1.42037	2.34666	2.21914	2.00621	3.16516	2.82117	2.38874	2.10993	2.14743	2.44448	2.26407	2
12	1.87188	1.83206	1.9921	1.68276	2.2026	2.05613	2.18064	1.73325	1.50956	2.13824	2.37238	2.33875	2.75461	2.55445	2.33173	2.23022	2.24683	2.47786	2.34991	2.15
13	1.8208	1.87593	2.08282	1.80594	2.33784	2.18744	2.34217	1.90174	1.68152	2.3023	2.50508	2.55867	2.58033	2.49838	2.37841	2.28783	2.34719	2.5979	2.43725	2.22
14	2.95474	2.84494	2.68552	2.41705	2.6702	2.54359	2.42297	2.16026	2.02891	2.88149	2.77534	2.72313	2.98082	2.86746	2.69798	2.43606	2.57856	2.89395	2.64733	2.42
15	1.71271	1.70008	1.96118	1.62692	2.25422	2.09093	2.2969	1.77295	1.51098	2.16949	2.59716	2.57586	2.81348	2.60316	2.38944	2.30467	2.32215	2.59776	2.48281	2.23
16	2.01851	1.99904	2.13613	1.84778	2.33588	2.20218	2.3039	1.88298	1.67252	2.30872	2.54469	2.5188	2.84763	2.67996	2.46057	2.35352	2.37955	2.63317	2.49864	2.25
17	1.89434	1.98547	2.3094	2.01452	2.6544	2.49269	2.73403	2.21818	1.96025	2.60375	3.03604	3.09743	2.86398	2.78315	2.69253	2.62126	2.68573	2.98688	2.83859	2.58
18	2.16907	2.26424	2.4686	2.22279	2.72355	2.59772	2.73064	2.31845	2.11236	2.72969	2.96015	3.02253	2.86664	2.83944	2.74781	2.65768	2.73024	3.00889	2.83711	2.59
19	2.23522	2.34367	2.5331	2.30702	2.77748	2.66267	2.78257	2.39408	2.19983	2.81859	3.05343	3.12014	2.85896	2.85989	2.78764	2.68748	2.77772	3.07313	2.89201	2.63
20	1.99283	2.00383	2.26541	1.94918	2.55702	2.39358	2.60278	2.09462	1.84055	2.4764	2.87399	2.87472	2.98003	2.81598	2.65504	2.55302	2.60614	2.86604	2.73905	2.48
21	2.02329	2.11763	2.45345	2.15767	2.80647	2.64443	2.89366	2.3715	2.11043	2.74565	3.17962	3.24527	2.99054	2.91357	2.83604	2.76508	2.83417	3.12824	2.97791	2.74
22	1.98805	1.99492	2.26829	1.93616	2.57276	2.41161	2.6191	2.09061	1.82636	2.48363	2.90074	2.89345	3.09368	2.90207	2.6985	2.61869	2.63814	2.91385	2.79449	2.55
23	2.32527	2.23937	2.35622	2.00121	2.54471	2.39611	2.48299	2.00291	1.76287	2.43945	2.60606	2.52481	3.38727	3.10634	2.75844	2.66017	2.62324	2.84168	2.72672	2.53
24	1.86021	1.96346	2.36406	2.03368	2.77541	2.59172	2.89975	2.30695	2.01055	2.64515	3.1145	3.19384	3.02515	2.9233	2.82727	2.75833	2.82733	3.10836	2.95462	2.72
25	2.07561	2.17364	2.46264	2.17893	2.78858	2.63347	2.84867	2.35441	2.10729	2.76682	3.15189	3.22053	2.96246	2.9052	2.81811	2.72658	2.81129	3.12228	2.95512	2.69
26	1.88588	1.81074	2.15375	1.74212	2.50566	2.29028	2.60468	1.96103	1.63921	2.26416	2.75499	2.69766	3.27409	2.94912	2.69155	2.60464	2.60652	2.80196	2.72148	2.49
27	2.41835	2.41791	2.58027	2.28706	2.79818	2.66465	2.77128	2.33515	2.11709	2.76818	2.9969	2.98936	3.24411	3.09562	2.90265	2.79115	2.83265	3.09057	2.94266	2.72
28	2.46933	2.55853	2.74694	2.51294	2.98334	2.86585	2.97481	2.58579	2.39128	3.03285	3.28678	3.35046	3.06222	3.04981	2.99076	2.86609	2.97708	3.27667	3.09407	2.83
29	2.42705	2.50937	2.72034	2.4542	2.98441	2.83938	2.99438	2.5558	2.33651	2.99135	3.22632	3.28954	3.11844	3.07859	2.99542	2.89007	2.97932	3.26644	3.0848	2.85
30	2.427	2.50932	2.72031	2.45417	2.98438	2.83936	2.99436	2.55577	2.33647	2.99134	3.22634	3.28962	3.11842	3.07856	2.9954	2.89005	2.97929	3.26643	3.08478	2.85
31	2.04162	1.98123	2.23358	1.86236	2.51929	2.34267	2.55466	1.99637	1.71723	2.387	2.81623	2.75344	3.26711	2.98422	2.7038	2.62278	2.60741	2.85722	2.76873	2.52
32	1.89198	1.91461	2.28597	1.91529	2.6699	2.46874	2.77947	2.16089	1.8516	2.49129	2.96684	2.98559	3.16764	2.96297	2.78615	2.70771	2.74513	2.99146	2.87149	2.63
33	3.54822	3.47229	3.37072	3.11625	3.39405	3.25669	3.18355	2.91018	2.77349	3.56443	3.45392	3.44168	3.52501	3.45495	3.36647	3.11665	3.28661	3.56018	3.31197	3.1
34	2.07879	2.18792	2.48881	2.21735	2.81761	2.6755	2.88254	2.39977	2.15839	2.79939	3.20184	3.27648	2.958	2.91361	2.84222	2.75641	2.84167	3.1528	2.98889	2.72
35	3.45677	3.30215	3.1181	2.84539	3.07303	2.94545	2.80806	2.55838	2.43354	3.27591	3.1824	3.09311	3.52423	3.35679	3.14352	2.87998	3.00315	3.30133	3.08407	2.83
36	1.91296	2.02485	2.42913	2.1025	2.84347	2.66201	2.96943	2.37882	2.08352	2.72116	3.19626	3.27952	3.07568	2.98292	2.89159	2.8249	2.89485	3.18363	3.0279	2.79
37	2.15718	2.19302	2.50692	2.17417	2.84164	2.66681	2.9148	2.36491	2.08997	2.73881	3.17095	3.18642	3.24537	3.08567	2.92991	2.85903	2.89253	3.16179	3.0399	2.79
38	2.98412	2.97534	3.07709	2.77103	3.26262	3.09394	3.18511	2.757	2.54295	3.29553	3.37194	3.41161	3.43734	3.34677	3.25347	3.07258	3.20482	3.47191	3.26128	3.06
39	2.9967	2.92935	3.01905	2.6705	3.20657	3.02178	3.1647	2.68815	2.44987	3.14776	3.24655	3.23388	3.74183	3.53269	3.28989	3.18082	3.20346	3.4186	3.31214	3.1
40	3.16428	3.15805	3.27308	2.96043	3.4777	3.28617	3.44884	2.99751	2.77184	3.46043	3.53436	3.58342	3.70209	3.59435	3.47133	3.3484	3.43145	3.65868	3.51475	3.3
41	3.2275	3.14644	3.14069	2.83241	3.25049	3.10097	3.14543	2.76254	2.57109	3.26011	3.26964	3.23075	3.8635	3.65817	3.36432	3.26186	3.25513	3.48374	3.38252	3.15
42	3.00741	3.03768	3.17065	2.86941	3.39597	3.23533	3.37836	2.92832	2.7033	3.38988	3.48472	3.54898	3.64605	3.55654	3.40716	3.30901	3.36947	3.62639	3.48286	3.29
43	3.1703	3.27022	3.48097	3.21111	3.76243	3.58509	3.7986	3.34595	3.11963	3.76972	3.90343	4.04023	3.66466	3.672	3.66558	3.58473	3.69401	3.95434	3.78954	3.59
44	3.24627	3.16549	3.22132	2.88852	3.36442	3.1841	3.25497	2.82533	2.61052	3.40522	3.53169	3.49586	3.7392	3.56862	3.41012	3.20622	3.32088	3.59402	3.40277	3.18
45	3.24625	3.16548	3.22132	2.88852	3.36443	3.18411	3.25497	2.82533	2.61051	3.40519	3.53163	3.49577	3.73918	3.56862	3.41012	3.20623	3.32089	3.59399	3.40276	3.18
46	3.33079	3.33249	3.42487	3.14877	3.59511	3.4356	3.50829	3.12165	2.92832	3.65037	3.69618	3.7555	3.65418	3.59941	3.55635	3.35959	3.52358	3.78185	3.55689	3.37
47	3.91346	3.87883	3.7817	3.57422	3.79463	3.67197	3.58159	3.36295	3.25363	4.01902	3.90313	3.93195	3.72529	3.72867	3.72056	3.45443	3.66907	3.95788	3.6942	3.45
48	3.42924	3.35811	3.41629	3.10853	3.5522	3.38005	3.44442	3.04457	2.84465	3.57501	3.63802	3.63263	3.84209	3.69619	3.57698	3.37183	3.50378	3.7357	3.54667	3.33
49	3.42933	3.35822	3.41635	3.1086	3.55223	3.38005	3.44439	3.04459	2.84469	3.57512	3.63822	3.63299	3.84203	3.69618	3.57699	3.37179	3.50379	3.73576	3.54681	3.33
50	3.23291	3.25173	3.3622	3.07316	3.55175	3.39753	3.47115	3.06009	2.85456	3.62786	3.75606	3.80008	3.65563	3.59954	3.52948	3.347	3.48999	3.79514	3.57426	3.37
51	3.23901	3.34879	3.52873	3.26736	3.78669	3.62518	3.79346	3.36351	3.14853	3.81628	3.8911	4.03212	3.68818	3.71492	3.69882	3.59895	3.71737	3.98637	3.80574	3.61
52	3.06132	3.10368	3.27162	2.96916	3.52635	3.35803	3.53785	3.06942	2.83521	3.51551	3.67528	3.74555	3.76676	3.67578	3.53073	3.46101	3.5059	3.77462	3.64597	3.42
53	3.33603	3.18553	3.18159	2.81518	3.28109	3.10347	3.12821	2.69229	2.47433	3.30942	3.42054	3.31953	3.98313	3.71139	3.42155	3.22095	3.27676	3.54939	3.38931	3.15
54	2.8824	2.88395	3.13336	2.7828	3.42659	3.23025	3.44564	2.90514	2.63488	3.3667	3.69505	3.72772	3.73721	3.58456	3.46479	3.32394	3.42391	3.69813	3.542	3.31
55	2.88134	2.96797	3.25006	2.93889	3.57451	3.39789	3.61024	3.09235	2.8334	3.5682	3.90013	3.99693	3.62583	3.58083	3.54545	3.40886	3.54727	3.86358	3.67066	3.45
56	2.98767	2.92786	3.15606	2.77093	3.42973	3.22037	3.43581	2.87096	2.58853	3.33418	3.68192	3.66054	3.96032	3.7222	3.52603	3.39069	3.45041	3.70415	3.58309	3.32
57	2.98306	3.07628	3.37045	3.05808	3.70513	3.52322	3.74939	3.22411	2.96146	3.68753	4.01423	4.12019	3.7406	3.69907	3.6694	3.54218	3.67697	3.98648	3.79648	3.57
58	3.49653	3.50203	3.52534	3.25231	3.66102	3.51956	3.55984	3.19817	3.01733	3.74062	3.75161	3.77167	4.01501	3.92171	3.71337	3.59798	3.64108	3.92865	3.77776	3.52
59	3.04509	3.05996	3.32125	2.97198	3.62526	3.42607	3.65057	3.10518	2.83248	3.56807	3.90194	3.94518	3.90405	3.76338	3.65317	3.5215	3.6198	3.89999	3.74413	3.5
60	3.05053	3.14212	3.44616	3.13014	3.78888	3.59889	3.84085	3.30705	3.04015	3.76932	4.11524	4.22046	3.8147	3.76971	3.74648	3.6246	3.75827	4.06964	3.88269	3.65
61	3.75565	3.76969	3.86154	3.57364	4.04022	3.86374	3.94895	3.54479	3.34271	4.10168	4.12795	4.1964	4.05753	4.01823	3.98346	3.7791	3.9559	4.22361	3.98644	3.78
62	4.05559	4.06142	4.17242	3.86246	4.37488	4.16209	4.33023	3.88436	3.66142	4.38124	4.45325	4.49412	4.56776	4.48068	4.36989	4.19797	4.33072	4.57871	4.39541	4.15
63	4.02707	4.12661	4.28305	4.01967	4.52482	4.34053	4.50676	4.08661	3.87653	4.58261	4.6678	4.78289	4.43553	4.46345	4.4466	4.29416	4.45681	4.74616	4.5315	4.31
64	4.12322	4.33638	4.59011	4.39833	4.88398	4.77445	4.92635	4.54527	4.35474	4.94829	5.11517	5.30937	4.42572	4.58583	4.71219	4.62304	4.79284	5.07037	4.88264	4.7

## Sheet: CDIE20
Calculated relative energies for the CDIE20 data set for each functional in kcal mol-1. Reference values are included, results are numbered to match scheme from https://www.chemie.uni-bonn.de/pctc/mulliken-center/software/GMTKN/gmtkn55. All results were calculated using Def2-QZVP.
	BLYP	B3LYP	B2-PLYP	DOD-BLYP	DSD-BLYP	XYGJ-OS	MP2	SCS-MP2	SOS-MP2	XCH-BLYP-UW12	B-LYP-osUW12	fB-LYP-osUW12	BLYP-D3BJ	B3LYP-D3BJ	B2-PLYP-D3BJ	DOD-BLYP-D3BJ	DSD-BLYP-D3BJ	XCH-BLYP-UW12-D3BJ	B-LYP-osUW12-D3BJ	Ref.
1	-1.53414	-1.32964	-2.07699	-2.54405	-2.2704	-2.84494	-2.99323	-3.31797	-3.48034	-1.34546	-1.89816	-1.90123	-1.8326	-1.56442	-2.16845	-2.82141	-2.41603	-1.43692	-1.8545	-3.3
2	6.28705	5.80876	5.36095	4.94239	5.15102	4.4989	4.91416	4.61101	4.45944	5.22702	4.99968	4.62422	6.1915	5.73987	5.34705	4.82183	5.08976	5.21312	5.00778	4.4
3	-4.15512	-4.85849	-4.87421	-5.28456	-4.82819	-5.72727	-4.32792	-4.85826	-5.12343	-5.57488	-5.37862	-5.71298	-4.72462	-5.31128	-5.05986	-5.79624	-5.08735	-5.76053	-5.74976	-5.9
4	-1.98856	-2.11109	-3.17751	-3.57525	-3.68287	-4.1993	-4.55473	-4.61146	-4.63982	-2.60768	-3.30255	-3.45176	-2.85207	-2.80558	-3.48201	-4.26589	-3.85747	-2.91217	-3.30445	-4.8
5	-0.576465	-0.373566	-1.1835	-1.67421	-1.42308	-2.00363	-2.24897	-2.56185	-2.71829	-0.439681	-1.08501	-1.10394	-0.98768	-0.705589	-1.32733	-2.00563	-1.58995	-0.58351	-1.0276	-2.5
6	5.99535	5.47429	5.00691	4.57768	4.78009	4.09441	4.55411	4.25296	4.10239	4.82706	4.5792	4.18805	5.79207	5.3153	4.94742	4.3926	4.69145	4.76757	4.56496	4
7	7.08952	6.49775	5.76788	5.43734	5.30229	4.72171	4.84007	4.80019	4.78024	5.63933	5.22404	4.78347	6.42695	5.96658	5.53959	4.93039	5.20428	5.41104	5.18699	4.5
8	2.36268	2.00422	1.97569	1.68469	1.97766	1.57206	2.04698	1.71303	1.54605	1.68625	1.83258	1.52856	2.78159	2.35199	2.1482	1.92668	2.01208	1.85876	1.86838	1.7
9	3.57384	3.17063	3.14629	2.8515	3.13403	2.61105	3.2285	2.90981	2.75046	2.78384	2.91024	2.5947	3.84765	3.39224	3.24975	3.07575	3.13908	2.8873	2.95856	2.9
10	5.78568	5.29129	4.7149	4.12495	4.47045	3.84808	4.10495	3.62289	3.38186	4.62946	4.3025	3.85385	5.12244	4.75763	4.48369	3.54527	4.2113	4.39826	3.97056	3.7
11	2.42997	2.04737	1.82798	1.4767	1.71503	1.29617	1.60408	1.28274	1.12208	1.60171	1.58949	1.26134	2.13435	1.81527	1.73759	1.09321	1.57261	1.51132	1.30079	1.2
12	5.60654	5.19887	4.62598	4.11283	4.36774	3.85875	3.97456	3.58787	3.39453	4.58786	4.25114	3.83425	4.80992	4.55075	4.33259	3.44283	4.09259	4.29447	3.85545	3.7
13	5.98433	5.5007	4.91543	4.28946	4.6804	3.98461	4.2945	3.77056	3.50859	4.87279	4.57181	4.12673	5.2925	4.94219	4.6713	3.68225	4.39832	4.62866	4.18553	3.8
14	6.75512	6.23641	5.53584	4.99235	5.1864	4.58972	4.73206	4.36897	4.18743	5.48362	5.05638	4.61218	5.65345	5.34189	5.13312	4.11341	4.85963	5.08089	4.61845	4.4
15	5.45712	5.03455	4.88221	4.43253	4.83341	4.13772	4.72394	4.2666	4.03794	4.63561	4.68879	4.29388	5.41796	5.00052	4.86333	4.43081	4.71064	4.61672	4.51142	4.2
16	1.88196	1.52977	1.83774	1.57607	1.99655	1.48741	2.25223	1.85039	1.64948	1.3514	1.73688	1.44679	2.25099	1.82655	1.96703	1.83702	1.95748	1.48069	1.59487	1.6
17	5.49485	5.0491	4.91463	4.44983	4.87884	4.14787	4.80369	4.32203	4.0812	4.66665	4.78402	4.37425	5.43745	5.00024	4.88935	4.43074	4.7426	4.64137	4.53867	4.2
18	7.44297	7.07232	6.60462	6.08829	6.44748	5.81603	6.13503	5.67948	5.45171	6.57189	6.32888	5.9195	7.4697	7.08927	6.60642	6.17668	6.36419	6.57369	6.36016	5.9
19	6.24095	5.92677	6.35212	5.43692	6.91358	5.31975	7.64397	6.21083	5.49425	5.93731	6.02888	5.84082	5.85418	5.61617	6.21588	5.23551	6.36273	5.80107	5.56401	5.8
20	10.2322	9.82095	9.50999	8.86818	9.4613	8.50904	9.23572	8.5814	8.25424	9.41819	9.31774	8.901	9.73085	9.41347	9.32523	8.58219	9.17329	9.23343	8.93036	8.6

## Sheet: DC13
Calculated relative energies for the DC13 data set for each functional in kcal mol-1. Reference values are included, results are numbered to match scheme from https://www.chemie.uni-bonn.de/pctc/mulliken-center/software/GMTKN/gmtkn55. All results were calculated using Def2-QZVP.
	BLYP	B3LYP	B2-PLYP	DOD-BLYP	DSD-BLYP	XYGJ-OS	MP2	SCS-MP2	SOS-MP2	XCH-BLYP-UW12	B-LYP-osUW12	fB-LYP-osUW12	BLYP-D3BJ	B3LYP-D3BJ	B2-PLYP-D3BJ	DOD-BLYP-D3BJ	DSD-BLYP-D3BJ	XCH-BLYP-UW12-D3BJ	B-LYP-osUW12-D3BJ	Ref.
1	1.78495	0.550889	-0.145515	0.341083	-1.392	0.741965	-2.67972	-1.08716	-0.290888	-0.512179	-0.206215	-0.43255	1.91886	0.65628	-0.102394	0.295331	-0.784745	-0.469058	0.0876725	-1
2	-51.1753	-42.6484	-24.7625	-27.7061	-6.21599	-13.0624	15.273	-1.70952	-10.2008	-19.0269	1.91619	11.1465	-40.4802	-34.0147	-20.7629	-18.3955	-10.7386	-15.0273	-11.7107	-7.7
3	-1.55495	-6.15583	-12.3889	-15.2747	-17.2174	-15.8894	-23.3376	-23.3688	-23.3844	-12.4705	-13.44	-18.2906	-1.35065	-5.98705	-12.307	-14.988	-16.3131	-12.3885	-13.0306	-15.2
4	15.2387	7.13518	-5.03876	-4.79461	-15.7704	-13.6653	-25.1263	-18.4066	-15.0467	-8.34622	-17.1333	-23.274	-3.14762	-8.06924	-12.3571	-17.2624	-16.8984	-15.6645	-17.2025	-18.8
5	15.2627	1.53792	-8.90077	-9.85766	-21.2819	-19.7656	-30.9123	-24.6348	-21.496	-21.3472	-26.9822	-40.5608	11.3998	-1.59508	-10.323	-13.9113	-18.1362	-22.7695	-22.1207	-22.9
6	-27.2045	-22.117	-24.9847	-29.7473	-21.9661	-29.2572	-23.4193	-30.7156	-34.3637	-14.6578	-15.1802	-11.1716	-28.1338	-22.8885	-25.3876	-29.5322	-24.8277	-15.0607	-17.1718	-25.7
7	-20.3128	-27.5827	-31.2873	-31.5989	-36.4315	-35.2405	-38.2473	-36.322	-35.3594	-37.6907	-38.8552	-44.0647	-24.8981	-31.3124	-32.9748	-35.8376	-35.804	-39.3782	-38.1137	-38.9
8	-99.5014	-95.5853	-97.3408	-87.0002	-101.079	-92.3693	-102.579	-88.792	-81.8984	-90.4555	-90.28	-84.3265	-104.888	-100.086	-99.6436	-96.4612	-99.41	-92.7584	-91.3217	-92
9	-70.1961	-73.9353	-85.6221	-90.1789	-95.8301	-104.151	-109.945	-110.68	-111.048	-88.8586	-100.146	-105.913	-94.1703	-93.9241	-96.1177	-113.121	-103.195	-99.3542	-103.016	-106
10	132.745	127.5	122.62	118.801	117.509	111.88	111.248	109.701	108.928	117.248	111.151	102.898	132.527	127.346	122.607	117.999	118.266	117.235	114.939	109.92
11	-53.9749	-64.8926	-59.9499	-59.8785	-61.8393	-56.0054	-54.6119	-55.5289	-55.9875	-76.7789	-73.7443	-79.031	-56.6306	-67.0447	-60.9107	-62.7348	-61.5909	-77.7397	-72.7714	-65.3
12	-43.0934	-55.3323	-52.6563	-53.1461	-56.1039	-49.4861	-50.6761	-51.3655	-51.7102	-69.1388	-66.619	-73.2852	-45.9066	-57.6105	-53.6686	-55.8026	-55.491	-70.151	-65.3871	-58.7
13	113.888	123.713	141.137	136.744	157.589	145.867	173.852	157.94	149.984	142.731	147.99	155.366	128.044	135.394	147.076	144.214	154.901	148.67	145.673	152.6

## Sheet: ICONF
Calculated relative energies for the ICONF data set for each functional in kcal mol-1. Reference values are included, results are numbered to match scheme from https://www.chemie.uni-bonn.de/pctc/mulliken-center/software/GMTKN/gmtkn55. All results were calculated using Def2-QZVP.
	BLYP	B3LYP	B2-PLYP	DOD-BLYP	DSD-BLYP	XYGJ-OS	MP2	SCS-MP2	SOS-MP2	XCH-BLYP-UW12	B-LYP-osUW12	fB-LYP-osUW12	BLYP-D3BJ	B3LYP-D3BJ	B2-PLYP-D3BJ	DOD-BLYP-D3BJ	DSD-BLYP-D3BJ	XCH-BLYP-UW12-D3BJ	B-LYP-osUW12-D3BJ	Ref.
1	1.05549	0.93294	0.967731	0.818218	1.00144	0.847647	1.01335	0.837422	0.749456	0.912107	0.98707	0.91995	1.19802	1.04379	1.00946	0.924497	0.9741	0.953831	0.967864	0.9
2	5.42153	5.13757	5.27983	5.13041	5.33153	5.18668	5.46189	5.26974	5.17366	5.01832	5.21254	5.08915	5.6789	5.33919	5.35771	5.33352	5.32604	5.09619	5.21737	5.29
3	0.00126255	0.516925	0.412857	0.230478	0.556272	0.30078	0.256984	0.0311887	-0.0817092	1.05328	0.76963	1.00355	0.124468	0.610183	0.444529	0.333522	0.465324	1.08496	0.82153	0.13
4	2.54544	2.97769	2.7688	2.46654	2.84949	2.49204	2.44533	2.13805	1.98441	3.37485	2.96087	3.13048	2.76442	3.14856	2.83415	2.5996	2.76245	3.4402	3.14881	2.33
5	11.6818	12.1858	12.2758	12.0794	12.5178	12.2236	12.4	12.0758	11.9137	12.6397	12.1221	12.325	11.782	12.2638	12.3103	11.8454	12.3001	12.6742	12.0961	12.16
6	-0.646449	-0.516362	-0.291277	-0.298603	-0.114869	-0.0684381	0.0491695	-0.0758753	-0.138398	-0.370104	-0.241724	-0.227901	0.2227	0.20953	0.0991711	0.111695	0.0819672	0.020344	-0.0202742	0.1
7	1.28635	1.26155	1.21662	1.19546	1.18623	1.10579	1.16681	1.15403	1.14764	1.21248	1.12606	1.13354	0.995894	1.02168	1.09263	1.10465	1.121	1.0885	1.13068	1.03
8	4.01486	4.01658	3.97998	3.9922	3.95297	3.72374	3.99805	4.00551	4.00923	4.09576	3.93181	4.06871	3.06515	3.25301	3.61371	3.72613	3.8532	3.72949	3.92266	3.51
9	2.38967	2.31464	2.07793	2.0741	1.90099	1.85261	1.70311	1.81179	1.86613	2.12759	1.91655	1.89715	1.58548	1.63541	1.70307	1.64829	1.63937	1.75273	1.73234	1.69
10	1.11532	1.53764	1.56301	1.53175	1.63503	1.51892	1.27353	1.32942	1.35737	1.9539	1.7297	2.06431	1.28145	1.65674	1.59494	1.46226	1.48251	1.98583	1.76944	1.4
11	5.1906	4.70646	4.67652	4.54586	4.52699	4.5021	4.69413	4.57851	4.52071	3.85311	3.29236	3.01815	4.55689	4.19922	4.45024	4.10805	4.36666	3.62684	3.52928	4.39
12	11.8041	11.4622	10.3267	10.0701	9.55563	9.33211	8.4347	8.75271	8.91172	10.7169	9.81954	9.69675	9.26436	9.36775	9.24516	8.53553	8.80859	9.63536	9.24514	9.16
13	0.510879	0.637634	0.582595	0.570338	0.584088	0.575448	0.476897	0.473156	0.471286	0.719009	0.642953	0.700987	0.449289	0.585342	0.55533	0.551394	0.562257	0.691744	0.651195	0.55
14	2.32342	2.80575	3.08241	2.84432	3.47448	3.33773	3.40525	2.95053	2.72316	3.60854	3.73322	4.01433	2.97751	3.32873	3.3051	3.57104	3.45752	3.83122	3.80084	3.55
15	1.24161	1.26544	1.33171	1.3515	1.35588	1.37706	1.40358	1.40586	1.407	1.28511	1.30241	1.31901	1.14303	1.18559	1.29628	1.26943	1.32679	1.24968	1.24363	1.33
16	2.60949	2.77797	3.11987	2.91331	3.46868	3.39096	3.69684	3.24838	3.02414	3.35301	3.6493	3.76235	2.86382	2.98216	3.20875	3.56935	3.45497	3.44189	3.60179	3.66
17	2.12649	2.39183	3.20352	2.98256	3.85264	3.87791	4.36619	3.7178	3.3936	3.35888	3.96272	4.1781	3.30665	3.3454	3.63168	4.54239	4.05805	3.78704	4.25623	4.35

## Sheet: MB16-43
Calculated relative energies for the MB16-43 data set for each functional in kcal mol-1. Reference values are included, results are numbered to match scheme from https://www.chemie.uni-bonn.de/pctc/mulliken-center/software/GMTKN/gmtkn55. All results were calculated using Def2-QZVP.
	BLYP	B3LYP	B2-PLYP	DOD-BLYP	DSD-BLYP	XYGJ-OS	MP2	SCS-MP2	SOS-MP2	XCH-BLYP-UW12	B-LYP-osUW12	fB-LYP-osUW12	BLYP-D3BJ	B3LYP-D3BJ	B2-PLYP-D3BJ	DOD-BLYP-D3BJ	DSD-BLYP-D3BJ	XCH-BLYP-UW12-D3BJ	B-LYP-osUW12-D3BJ	Ref.
1	773.538	807.135	807.593	786.37	824.914	855.098	804.326	772.799	757.035	866.34	859.078	886.598	811.972	839.283	824.34	827.904	828.725	883.087	873.058	869.597
2	627.11	650.755	686.086	676.659	723.832	706.203	757.533	723.426	706.372	694.848	697.005	713.048	682.532	697.252	710.787	736.852	735.232	719.549	722.768	737.787
3	434.06	442.59	472.523	463.348	495.208	482.885	506.906	480.453	467.226	474.625	478.805	487.688	479.49	481.194	494.071	518.315	512.773	496.172	505.868	518.658
4	293.566	285.792	314.516	293.624	342.784	315.839	384.069	337.777	314.631	303.945	315.336	315.254	323.954	311.757	329.251	336.389	347.301	318.68	328.375	356.848
5	87.1514	103.402	116.964	90.5086	145.235	114.129	151.522	107.133	84.9389	140.836	148.228	158.372	163.359	166.647	149.278	156.448	156.053	173.15	172.816	147.683
6	312.852	314.035	334.111	319.755	356.09	343.029	381.778	349.685	333.638	333.608	337.93	344.489	344.972	341.001	348.354	357.009	360.275	347.851	354.039	368.494
7	485.768	510.608	531.931	524.214	559.969	539.23	576.335	551.661	539.324	556.838	555.353	576.671	515.991	535.775	544.772	554.32	559.509	569.679	564.167	557.984
8	599.24	612.136	639.109	628.411	670.462	647.566	701.651	668.917	652.549	662.995	672.984	696.769	639.245	645.276	655.723	668.417	671.417	679.609	683.8	681.96
9	337.318	345.51	361.482	348.065	380.317	361.742	392.959	366.107	352.681	366.955	367.127	372.063	364.629	368.311	373.235	376.669	381.6	378.708	376.432	381.43
10	0.557476	-0.989283	18.1359	-1.2539	40.4111	12.1713	64.7159	26.2415	7.00429	23.2891	37.188	42.9899	42.6603	34.0889	36.2147	38.1153	44.7609	41.3679	49.8479	46.3073
11	253.614	251.877	268.886	260.065	285.573	271.24	307.755	285.429	274.267	269.69	276.149	281.172	283.037	276.623	282.108	289.171	290.928	282.912	287.841	294.406
12	404.619	406.639	424.493	407.503	447.048	426.294	466.727	432.885	415.964	432.72	435.28	442.463	443.395	439.256	441.946	449.437	453.41	450.173	451.154	453.065
13	-22.0828	-13.7396	-9.89505	-15.907	3.2755	9.51234	-5.67982	-18.9162	-25.5344	19.6697	29.6034	43.5352	19.4885	20.738	7.3897	23.6113	11.3442	36.9545	36.2214	19.8751
14	322.113	318.262	342.225	322.101	366.635	350.346	397.588	356.117	335.381	329.246	330.333	322.045	366.074	355.423	362.653	373.802	377.485	349.674	351.79	384.889
15	150.734	147.633	175.989	162.016	200.17	180.309	233.757	199.621	182.553	163.666	177.434	177.075	197.497	187.375	198.367	211.68	214.908	186.044	199.051	216.096
16	220.352	205.904	253.096	217.656	294.789	261.624	348.918	274.953	237.971	218.438	233.229	218.589	283.554	259.925	284.019	302.311	314.454	249.361	268.41	326.757
17	589.998	601.757	627.453	608.763	658.697	623.169	686.687	645.19	624.442	637.564	634.523	647.716	619.029	626.042	640.101	637.796	653.824	650.212	643.321	653.593
18	507.495	528.84	549.753	531.072	581.028	559.041	599.28	558.848	538.631	567.92	562.971	577.002	540.624	556.339	563.542	564.451	576.622	581.709	570.286	580.861
19	559.078	582.492	612.983	599.214	650.108	630.135	678.759	641.166	622.37	629.826	632.834	647.685	623.745	636.678	641.718	667.426	663.873	658.561	660.157	664.56
20	218.375	227.6	231.41	210.276	248.998	218.55	252.754	218.747	201.743	255.677	253.838	264.354	246.367	250.745	242.848	235.825	245.266	267.116	260.507	242.805
21	678.248	703.804	743.312	737.041	781.495	771.003	817.209	786.534	771.196	748.2	744.606	759.094	730.275	748.232	768.608	805.919	802.698	773.496	780.046	806.225
22	625.025	650.906	672.212	666.897	700.562	690.413	718.71	696.181	684.917	695.06	689.625	710.788	655.684	676.434	685.148	699.948	701.19	707.996	701.884	706.204
23	157.168	137.067	169.661	132.02	202.94	157.399	253	182.193	146.789	146.39	161.617	151.009	206.225	178.227	191.65	184.335	203.764	168.378	175.821	215.393
24	960.979	1000.94	1037.02	1029.75	1078.6	1044.76	1103.98	1072.76	1057.14	1073.19	1068.53	1103.92	996.968	1031.07	1052.92	1062.5	1076.9	1089.1	1078.7	1070.64
25	286.737	291.201	304.168	297.723	319.273	307.82	335.851	318.358	309.611	309.035	310.279	316.531	304.398	306.018	312.005	316.849	320.335	316.872	316.424	322.49
26	304.967	312.605	333.047	327.93	354.918	348.221	377.743	357.93	348.024	340.909	343.764	354.782	346.278	347.349	351.617	373.588	367.035	359.478	365.825	373.668
27	69.0709	70.4173	85.3568	73.2876	103.277	92.9533	118.449	93.4221	80.9088	97.2018	111.077	120.107	104.996	100.367	100.754	109.951	107.927	112.599	118.357	114.967
28	273.329	291.774	300.687	283.955	320.806	309.851	321.13	292.065	277.533	322.869	315.871	324.296	303.69	316.728	312.628	314.672	318.192	334.81	320.868	325.121
29	640.467	659.063	676.951	656.975	704.19	667.802	715.037	677.016	658.006	700.63	695.615	710.592	680.105	692.009	693.771	693.011	703.531	717.45	708.82	695.103
30	1178.96	1220.25	1260.89	1241.73	1308.38	1251.65	1334.32	1285.65	1261.31	1293.02	1283.21	1317.25	1221.58	1256.17	1280.35	1287.88	1307.73	1312.49	1305.51	1290.74
31	428.899	455.637	489.428	472.837	531.072	499.183	562.313	518.534	496.645	506.596	516.472	534.47	494.905	510.868	518.757	534.264	540.133	535.925	536.65	534.9
32	600.917	612.083	645.27	615.971	683.868	644.618	715.009	657.253	628.375	650.293	653.815	660.28	651.686	654.669	667.831	671.179	686.418	672.854	669.272	685.582
33	251.445	264.695	283.424	264.402	311.535	287.955	331.549	292.37	272.781	297.501	299.711	309.79	293.622	299.798	301.37	304.508	312.42	315.448	310.736	312.692
34	444.251	464.659	491.771	481.876	525.12	505.698	551.898	520.648	505.023	518.961	523.718	547.666	493.033	505.491	513.236	530.883	532.861	540.427	541.333	538.264
35	172.898	156.976	183.509	163.243	206.805	182.795	246.293	203.519	182.131	170.41	188.365	180.581	229.004	204.334	209.469	221.035	222.568	196.37	210.368	228.175
36	489.316	524.675	536.757	535.928	558.891	550.87	558.645	548.195	542.97	570.442	561.187	584.337	518.874	549.014	548.564	561.178	558.991	582.249	569.753	552.85
37	542.154	538.335	577.036	565.205	613.281	595.176	667.092	627.374	607.515	572.606	593.755	607.229	585.037	574.402	596.446	611.024	617.248	592.016	602.265	629.784
38	84.9543	72.2702	79.2792	54.3064	92.3757	68.8961	104.739	66.9723	48.0892	77.8809	81.853	74.1791	121.466	103.01	95.8266	96.4296	99.5608	94.4283	97.6517	98.1943
39	397.621	412.044	388.312	351.646	376.114	372.653	308.004	275.281	258.92	440.382	435.222	383.031	426.632	436.236	400.762	378.853	381.018	452.832	404.524	436.404
40	-369.104	-414.415	-399.828	-433.439	-389.145	-416.281	-357.186	-411.132	-438.105	-431.036	-404.442	-426.63	-331.069	-382.266	-382.125	-392.787	-382.047	-413.333	-394.387	-362.981
41	88.8655	91.6873	91.6105	64.7375	100.753	87.806	93.0412	55.6539	36.9602	124.127	97.2635	91.5026	138.254	133.087	113.624	114.348	112.973	146.141	160.556	160.291
42	663.925	688.227	716.567	702.962	754.41	724.547	784.576	745.982	726.684	745.42	747.485	775.545	698.258	717.119	732.026	744.372	755.28	760.879	760.644	754.646
43	352.634	372.607	388.062	367.857	415.788	392.517	426.104	386.269	366.351	419.308	414.698	429.594	397.144	409.867	407.511	417.534	420.967	438.756	432.714	421.968

## Sheet: PA26
Calculated relative energies for the PA26 data set for each functional in kcal mol-1. Reference values are included, results are numbered to match scheme from https://www.chemie.uni-bonn.de/pctc/mulliken-center/software/GMTKN/gmtkn55. All results were calculated using Def2-QZVP.
	BLYP	B3LYP	B2-PLYP	DOD-BLYP	DSD-BLYP	XYGJ-OS	MP2	SCS-MP2	SOS-MP2	XCH-BLYP-UW12	B-LYP-osUW12	fB-LYP-osUW12	BLYP-D3BJ	B3LYP-D3BJ	B2-PLYP-D3BJ	DOD-BLYP-D3BJ	DSD-BLYP-D3BJ	XCH-BLYP-UW12-D3BJ	B-LYP-osUW12-D3BJ	Ref.
1	166.828	168.457	167.876	169.153	167.646	167.706	166.726	168.826	169.876	169.613	169.744	170.995	167.212	168.76	167.992	169.446	168.173	169.729	170.259	167.2
2	197.983	198.58	196.535	197.612	194.802	195.381	191.528	194.539	196.044	198.541	198.279	198.922	198.604	199.08	196.745	198.126	195.882	198.751	199.529	192.9
3	216.071	216.368	214.075	214.843	212.067	212.644	208.31	211.108	212.507	215.977	215.641	216.002	216.731	216.901	214.301	215.398	213.162	216.203	216.98	209.2
4	227.686	227.709	225.209	225.618	222.987	223.455	218.81	221.311	222.562	226.949	226.512	226.58	228.376	228.266	225.446	226.205	224.061	227.186	227.926	219.2
5	209.913	211.468	211.301	212.532	211.384	211.888	211.179	212.799	213.609	212.855	212.694	214.104	210.443	211.891	211.472	213.062	211.823	213.026	213.509	211.9
6	169.986	171.533	171.196	172.201	171.278	171.893	171.05	172.35	173.001	172.694	172.411	173.514	170.372	171.839	171.32	172.586	171.617	172.818	173.011	171.4
7	157.534	158.635	157.281	158.422	156.671	156.796	155.562	157.613	158.639	159.247	159.3	160.205	158.093	159.082	157.465	158.99	157.344	159.431	160.051	157.4
8	158.723	157.785	157.05	157.904	156.352	155.626	156.703	158.119	158.827	156.955	157.964	158.482	159.573	158.474	157.358	158.845	157.136	157.263	159.312	156.9
9	191.651	193.316	193.745	195.633	194.017	193.722	194.121	196.56	197.779	194.91	195.679	198.103	192.434	193.949	194.024	196.556	194.716	195.188	197.134	192.8
10	175.145	175.179	174.505	175.811	173.876	174.212	173.588	175.751	176.832	175.074	175.638	176.546	175.841	175.74	174.748	176.652	174.687	175.317	176.832	174.3
11	139.04	138.537	137.816	138.82	137.152	137.615	137.213	138.918	139.771	137.808	138.352	138.677	139.58	138.972	138.003	139.476	137.844	137.996	139.282	137.8
12	104.796	104.914	105.082	105.473	105.303	105.325	106.074	106.375	106.526	105.04	105.523	106.06	105.042	105.11	105.16	105.712	105.399	105.118	105.774	106.2
13	127.901	124.48	122.831	122.75	121.04	120.615	120.643	121.705	122.236	120.491	121.283	119.632	128.477	124.954	123.05	123.103	121.867	120.71	122.415	120.8
14	190.887	192.206	191.727	192.924	191.506	191.95	190.972	192.728	193.605	193.092	192.65	193.625	191.791	192.938	192.043	193.692	192.149	193.408	193.845	191.9
15	190.532	192.179	190.859	191.833	190.412	190.532	188.977	190.765	191.659	193.227	192.481	193.514	191.201	192.72	191.093	192.439	190.996	193.461	193.516	190.9
16	216.994	218.196	218.005	219.368	217.899	218.58	217.733	219.58	220.504	219.266	219.109	220.39	218.035	219.036	218.365	220.332	218.583	219.625	220.429	218.2
17	203.817	203.881	201.355	204.012	198.465	202.757	194.134	199.987	202.913	203.438	203.422	204.272	204.64	204.545	201.641	204.492	200.446	203.724	204.906	200.4
18	212.989	213.597	211.437	212.131	210.276	210.48	208.194	210.131	211.099	213.449	212.332	212.828	213.633	214.119	211.649	212.859	210.998	213.661	213.834	210.2
19	189.364	190.002	188.916	190.234	187.997	188.449	186.455	189.002	190.276	190.474	190.512	191.635	190.186	190.668	189.208	191.178	188.946	190.766	191.951	188.3
20	186.525	185.615	184.379	186.208	183.077	181.997	182.826	185.939	187.496	184.762	185.869	187.079	186.912	185.911	184.472	184.996	183.59	184.854	186.446	181.9
21	220.159	221.592	221.212	222.949	220.87	221.592	220.379	222.871	224.118	222.741	222.53	223.837	221.335	222.552	221.649	223.923	221.826	223.178	224.054	221.3
22	223.751	223.686	220.626	223.083	216.934	221.128	210.92	217.243	220.404	222.923	222.989	223.46	225.197	224.851	221.13	224.02	219.327	223.427	224.925	219.6
23	196.55	195.139	192.415	195.432	188.556	194.413	183.679	190.571	194.017	193.115	193.962	194.133	198.613	196.815	193.166	197.015	191.389	193.866	196.403	192.9
24	211.257	212.436	211.153	211.912	210.585	210.327	209.293	210.802	211.556	213.084	212.4	213.222	212.087	213.115	211.456	212.663	211.203	213.387	213.694	210.7
25	237.58	238.656	236.911	238.188	235.811	236.917	233.85	236.38	237.645	239.289	238.148	239.354	238.721	239.585	237.326	239.164	236.839	239.704	240.209	236
26	235.388	237.035	235.656	237.366	234.81	235.975	233.235	236.131	237.579	238.129	237.109	238.551	236.416	237.868	236.02	238.185	235.827	238.494	238.96	235.1

[truncated: 34 more sheets: PNICO23, RG18, S66, TAUT15, ALK8, BH76, BHROT27, CHB6, DIPCS10, G21IP, ISO34, MCONF, PArel, PX13, RSE43, SCONF, WCPT18, ALKBDE10, BHDIV10, BSR36 …]
